# Supplementary material
Source: ML conference proceedings conference paper supplement (https://proceedings.mlr.press/v70/rukat17a.html)
Supplement: Supplementary file [file rukat17a-supp.pdf]

---

## Bayesian Boolean Matrix Factorisation – Supplementary Information

---

Tammo Rukat<sup>1</sup> Chris C. Holmes<sup>1,2</sup> Michalis K. Titsias<sup>3</sup> Christopher Yau<sup>4,5</sup>

### A. Derivation of the Conditionals

Here we derive the full conditional for a latent variable  $z_{nl}$  as stated in eq. (4). The expression for  $u_{ld}$  is analogous. We start from the full joint:

$$p(\mathbf{X}, \mathbf{U}, \mathbf{Z}, \lambda) = p(\mathbf{X}|\mathbf{U}, \mathbf{Z}, \lambda)p(\mathbf{Z})p(\mathbf{U})p(\lambda).$$

We drop terms that do not depend on  $z_{nl}$ , and plug in the likelihood from eq. (3):

$$p(z_{nl}|\cdot) \propto \prod_d \sigma \left[ \lambda \tilde{x}_{nd} (1 - 2 \prod_{l'} (1 - z_{nl'} u_{l'd})) \right] p(z_{nl}).$$

Next, we normalise this expression for  $z_{nl} \in [0, 1]$  and restrict to  $z_{nl} = 1$  for simplicity:

$$p(z_{nl} = 1|\cdot) = \sigma \left[ \text{logit}(p(z_{nl})) + \sum_d \log \frac{1 + \exp[-\lambda \tilde{x}_{nd} (1 - 2 \prod_{l'} (1 - z_{nl'} u_{l'd}))]_{z_{nl}=0}}{1 + \exp[-\lambda \tilde{x}_{nd} (1 - 2 \prod_{l'} (1 - z_{nl'} u_{l'd}))]_{z_{nl}=1}} \right]. \quad (9)$$

We can distinctly simplify the second line of equation eq. (9) by distinguishing the two possible contributions to the sum. Changing  $z_{nl}$  from 0 to 1 in the fraction inside the sum can have the following two consequences:

1. Numerator and denominator remain equal, then the contribution to the sum is zero.
2. The numerator's exponent evaluates to  $\lambda \tilde{x}_{nd}$  and the denominator's exponent to  $-\lambda \tilde{x}_{nd}$ , then the contribution to the sum is  $\lambda \tilde{x}_{nd}$ , as we can see by using the identity  $\log(1 + e^x) - \log(1 + e^{-x}) = x$ .

For scenario 2 to take place, we can see from eq. (9) that two conditions need to be met:

1.  $u_{ld} = 1$ . Otherwise, the value  $z_{nl}$  does not effect the likelihood. Viewed es directed graphical model, there would be no link between  $z_{nl}$  and  $x_{nd}$ .
2.  $z_{n'l'} u_{l'd} = 0 \forall l' \neq l$ . Otherwise, another parent already explains  $x_{nd}$ . Viewed as directed graphical model,  $x_{nd}$  would be *explained away*.

Thus we find the equality for the fraction in eq. (9):

$$\sum_d \log \frac{1 + \exp[-\lambda \tilde{x}_{nd} (1 - 2 \prod_{l'} (1 - z_{nl'} u_{l'd}))]_{z_{nl}=0}}{1 + \exp[-\lambda \tilde{x}_{nd} (1 - 2 \prod_{l'} (1 - z_{nl'} u_{l'd}))]_{z_{nl}=1}} = \lambda \sum_d \tilde{x}_{nd} u_{ld} \prod_{l' \neq l} (1 - z_{nl'} u_{l'd}).$$

This leads to the full conditional as given in eq. (4):

$$p(z_{nl}|\cdot) = \sigma \left[ \text{logit}(p(z_{nl})) + \lambda \tilde{z}_{nl} \sum_d \tilde{x}_{nd} u_{ld} \prod_{l' \neq l} (1 - z_{nl'} u_{l'd}) \right].$$

---

<sup>1</sup>Department of Statistics, University of Oxford, UK <sup>2</sup>Nuffield Department of Medicine, University of Oxford, UK <sup>3</sup>Department of Informatics, Athens University of Economics and Business, Greece <sup>4</sup>Centre for Computational Biology, Institute of Cancer and Genomic Sciences, University of Birmingham, UK <sup>5</sup>Wellcome Trust Centre for Human Genetics, University of Oxford, UK. Correspondence to: Tammo Rukat <tammo.rukat@stats.ox.ac.uk>.
